# Supplementary material for: Evaluation of Monocarboxylate Transporter 4 in Inflammatory Bowel Disease and Its Potential Use as a Diagnostic Marker
Source: Hindawi journal article supplement (doi:10.1155/2018/2649491), 2018-01-01

MCT1

healthy control

IBD group

Case1

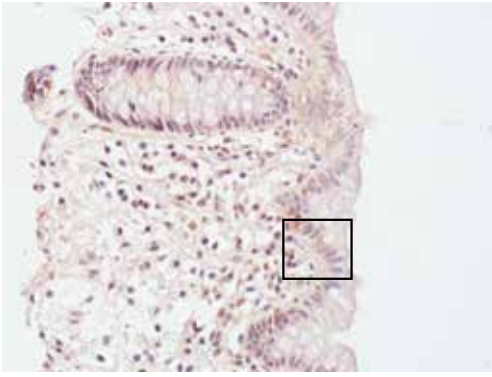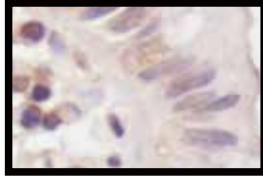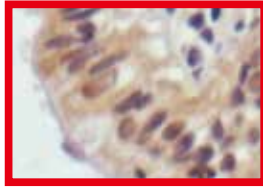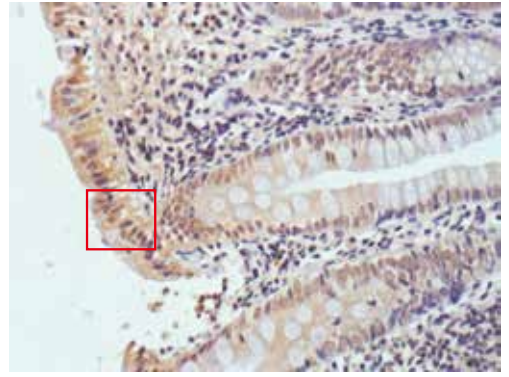

Case2

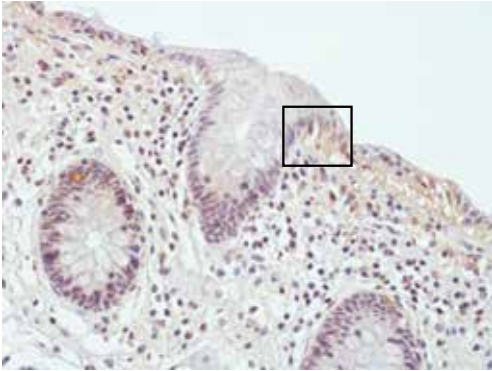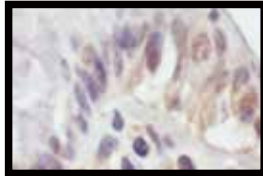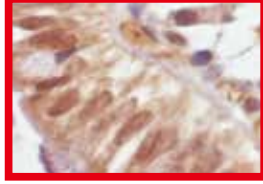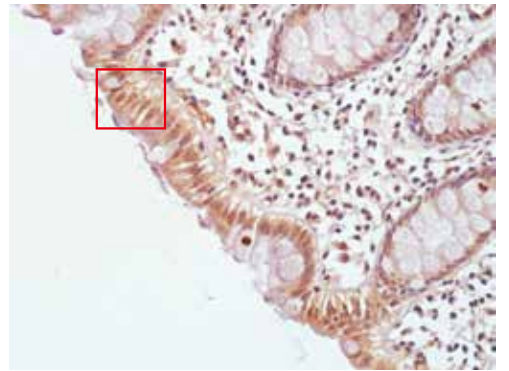

Supplement: f2 [file 2649491.f2.pdf]
