# Supplementary material for: Evaluation of Monocarboxylate Transporter 4 in Inflammatory Bowel Disease and Its Potential Use as a Diagnostic Marker
Source: Dis Markers. 2018 May 8;2018:2649491. doi: 10.1155/2018/2649491 (PMC5964618; doi:10.1155/2018/2649491)
Supplement: Supplementary 1 — Supplementary materials S1: the detailed information of 54 patients were listed. [file 2649491.f1.xlsx]

## Sheet: Sheet1
Patients	Gender	Age	Degree of mucosal inflammation	Lactic acid level
Case1	Male	Y14	Moderate	1.5
Case2	Female	Y7	Severe	1.7
Case3	Female	Y9	Severe	1.8↑
Case4	Male	Y13	Severe	1.4
Case5	Female	Y13	Severe	2.1↑
Case6	Male	Y4	Moderate	1.4
Case7	Male	Y9	Moderate	2.1↑
Case8	Male	Y12	Severe	3.9↑
Case9	Male	Y12	Severe	2.1↑
Case10	Male	Y13	Moderate	1.3
Case11	Male	Y8	Mild	1.8↑
Case12	Male	Y6	Moderate	2.5↑
Case13	Male	Y9	Moderate	1.7
Case14	Male	Y13	Mild	3.4↑
Case15	Male	Y15	Mild	2.5↑
Case16	Male	Y13	Moderate	2.4↑
Case17	Female	Y10	Moderate	2.5↑
Case18	Male	Y14	Mild	3.0↑
Case19	Male	Y1	Mild	2.4↑
Case20	Male	Y8	Moderate	1.6
Case21	Male	Y7	Moderate	2.3↑
Case22	Female	Y13	Severe	4.2↑
Case23	Female	Y1	Moderate	1.9↑
Case24	Female	Y15	Mild	1.5
Case25	Male	Y2	Severe	3.5↑
Case26	Male	Y12	Mild	3.1↑
Case27	Female	Y13	Moderate	2.6↑
Case28	Male	Y16	Moderate	2.0↑
Case29	Male	Y12	Severe	3.4↑
Case30	Male	Y1	Moderate	2.7↑
Case31	Male	Y10	Mild	1.6
Case32	Female	Y3	Mild	2.5↑
Case33	Female	Y2	Moderate	3.5↑
Case34	Male	Y3	Severe	2.4↑
Case35	Male	Y7	Moderate	3.8↑
Case36	Male	M2	Mild	2.0↑
Case37	Female	Y3	Mild	1.7
Case38	Female	Y3	Mild	2.5↑
Case39	Male	Y3	Moderate	2.9↑
Case40	Male	Y12	Severe	2.0↑
Case41	Male	Y1	Mild	2.1↑
Case42	Male	Y7	Severe	2.7↑
Case43	Male	Y3	Mild	2.8↑
Case44	Female	Y1	Moderate	2.2↑
Case45	Female	Y11	Severe	1.9↑
Case46	Male	Y6	Mild	1.7
Case47	Male	Y10	Moderate	3.4↑
Case48	Male	M9	Moderate	2.5↑
Case49	Male	Y3	Moderate	2.4↑
Case50	Male	Y9	Mild	2.5↑
Case51	Male	Y4	Moderate	3.0↑
Case52	Female	Y5	Mild	6.0↑
Case53	Male	Y8	Moderate	2.0↑
Case54	Male	Y13	Moderate	1.8↑
